# Supplementary figures and images for: Genomodifier capacity assay: a non-cell test using dsDNA molecules to evaluate the genotoxic/genoprotective properties of chemical compounds
Source: Royal Society of Chemistry journal article supplement (doi:10.1039/c4ay01709a), 2014-01-01

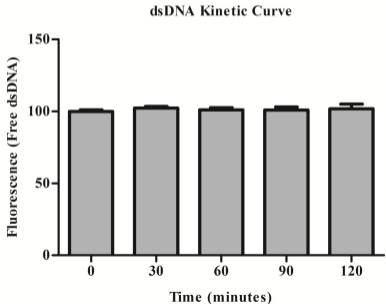

Supplement: c4ay01709a1.pdf [file c4ay01709a1.pdf]
